# Supplementary material for: A catalyst support for direct-ammonia solid-oxide fuel cell anodes based on lanthanum titanium oxynitride
Source: Royal Society of Chemistry journal article supplement (doi:10.1039/d2ta01977a), 2022-01-01
Supplement: d2ta01977a1.pdf [file d2ta01977a1.pdf]

# Supplementary Information

## Catalyst Support for Direct-Ammonia Solid-Oxide Fuel Cell Anodes based on Lanthanum Titanium Oxynitride

*Saurav Sorcar<sup>1#</sup>, Hodaya Zinowitz<sup>1#</sup>, Eswaravara Prasadarao Komarala<sup>1</sup>, Nomi Moshe<sup>1</sup>, Ira Agranovich<sup>1</sup>, Brian A. Rosen<sup>1\*</sup>*

*<sup>1</sup>Department of Materials Science and Engineering, Tel Aviv University, Ramat Aviv 6997801, Israel*

*#Authors with equal contribution*

*\*Corresponding author: [barosen@post.tau.ac.il](mailto:barosen@post.tau.ac.il)*

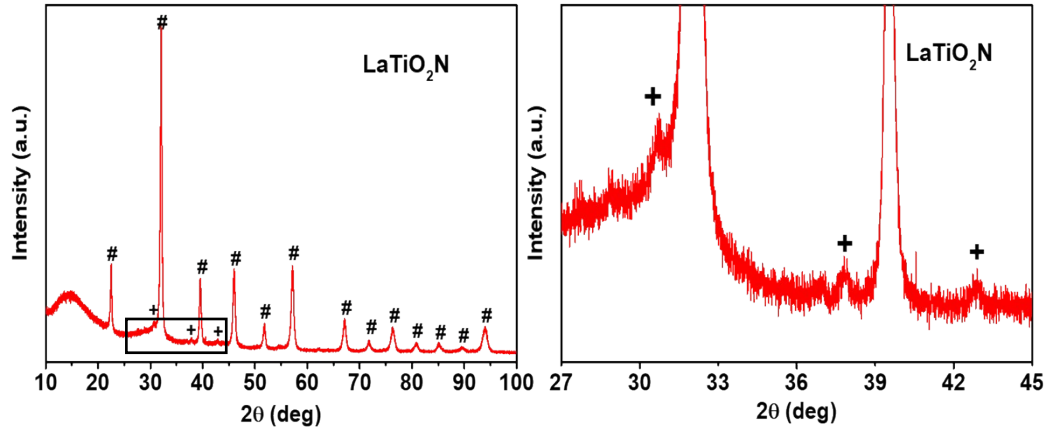

**Figure. S1** XRD result of  $\text{LaTiO}_2\text{N}$  and its corresponding zoomed in data from  $2\theta$  values  $27^\circ$  to  $46^\circ$ . (#  $\text{LaTiNO}_2$  PDF: 04-014-5881), (+  $\text{Ti}_5\text{O}_9$  PDF: 04-005-4465)

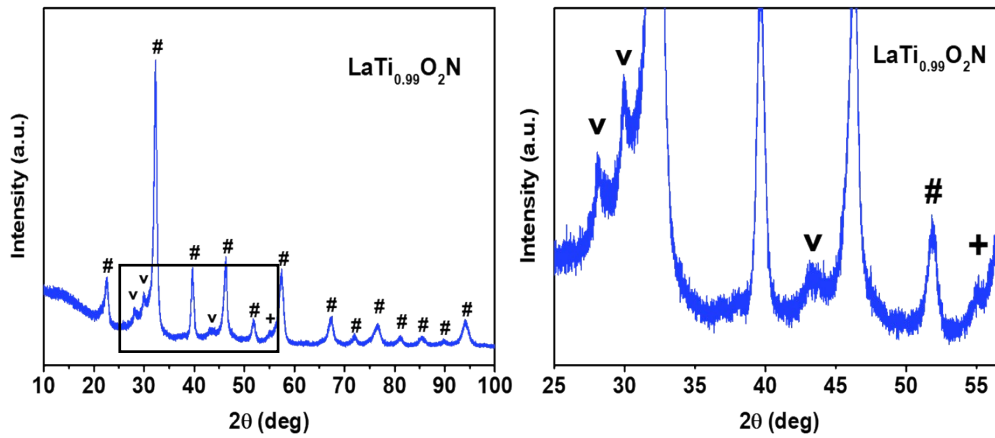

**Figure. S2** XRD result of  $\text{LaTi}_{0.99}\text{O}_2\text{N}$  and its corresponding zoomed in data from  $2\theta$  values  $25^\circ$  to  $57^\circ$ . (#  $\text{LaTiNO}_2$  PDF: 04-014-5881), (v  $\text{La}_2\text{Ti}_2\text{O}_7$  PDF: 00-015-0334), (+  $\text{Ti}_5\text{O}_9$  PDF: 04-005-4465)

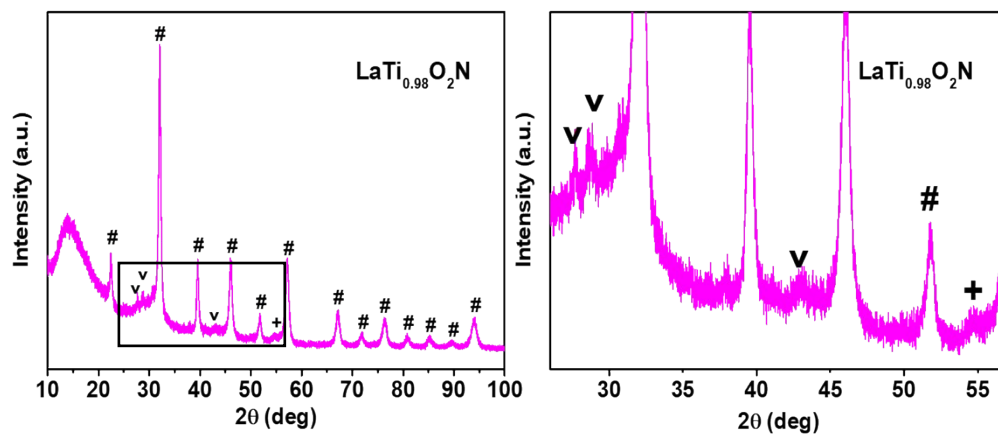

**Figure. S3** XRD result of  $\text{LaTi}_{0.98}\text{O}_2\text{N}$  and its corresponding zoomed in data from  $2\theta$  values  $26^\circ$  to  $57^\circ$ . (#  $\text{LaTiNO}_2$  PDF: 04-014-5881), (v  $\text{La}_2\text{Ti}_2\text{O}_7$  PDF: 00-015-0334), (+  $\text{Ti}_5\text{O}_9$  PDF: 04-005-4465)

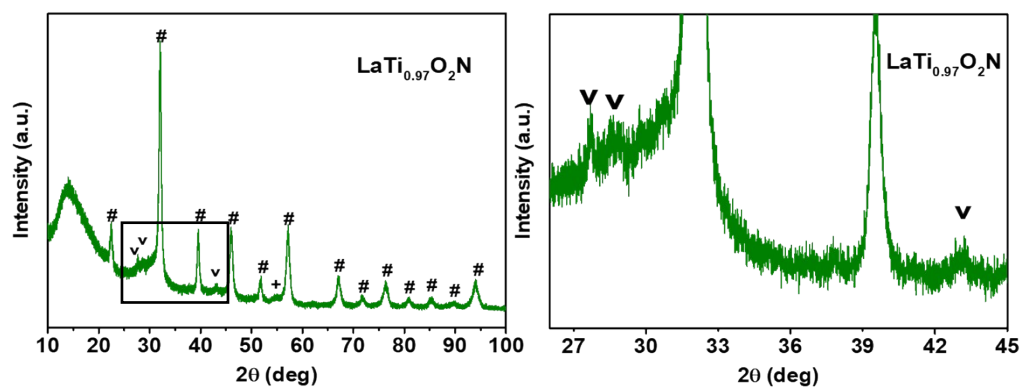

**Figure. S4** XRD result of  $\text{LaTi}_{0.97}\text{O}_2\text{N}$  and its corresponding zoomed in data from  $2\theta$  values  $26^\circ$  to  $45^\circ$ . (#  $\text{LaTiNO}_2$  PDF: 04-014-5881), (v  $\text{La}_2\text{Ti}_2\text{O}_7$  PDF: 00-015-0334), (+  $\text{Ti}_5\text{O}_9$  PDF: 04-005-4465)

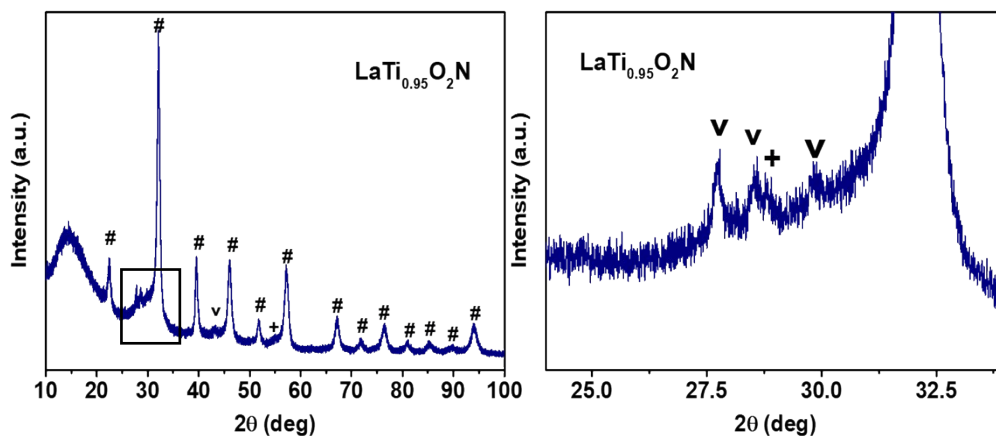

**Figure. S5** XRD result of  $\text{LaTi}_{0.95}\text{O}_2\text{N}$  and its corresponding zoomed in data from  $2\theta$  values  $24^\circ$  to  $34^\circ$ . (#  $\text{LaTiNO}_2$  PDF: 04-014-5881), (+  $\text{Ti}_5\text{O}_9$  PDF: 04-005-4465), (v  $\text{La}_2\text{Ti}_2\text{O}_7$  PDF: 00-015-0334)

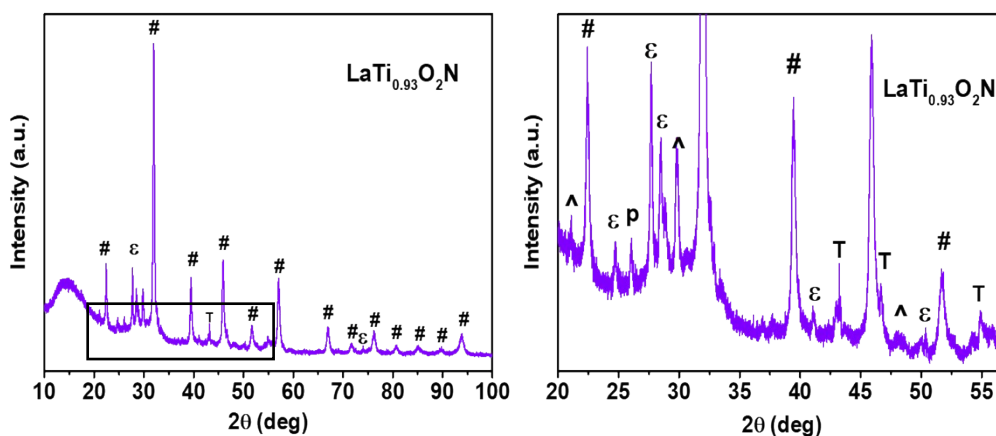

**Figure. S6** XRD result of  $\text{LaTi}_{0.93}\text{O}_2\text{N}$  and its corresponding zoomed in data from  $2\theta$  values  $20^\circ$  to  $57^\circ$ . (#  $\text{LaTiNO}_2$  PDF: 04-014-5881), (T  $\text{Ti}_6\text{O}_{11}$  PDF: 00-050-0788), (^  $\text{La}_2\text{Ti}_2\text{O}_7$  PDF: 04-006-7220), (ε  $\text{La}_2\text{TiO}_5$  PDF: 04-011-9299), (p  $\text{La}_{1.6}\text{Ti}_{0.4}\text{O}_3$  PDF: 04-001-6803)

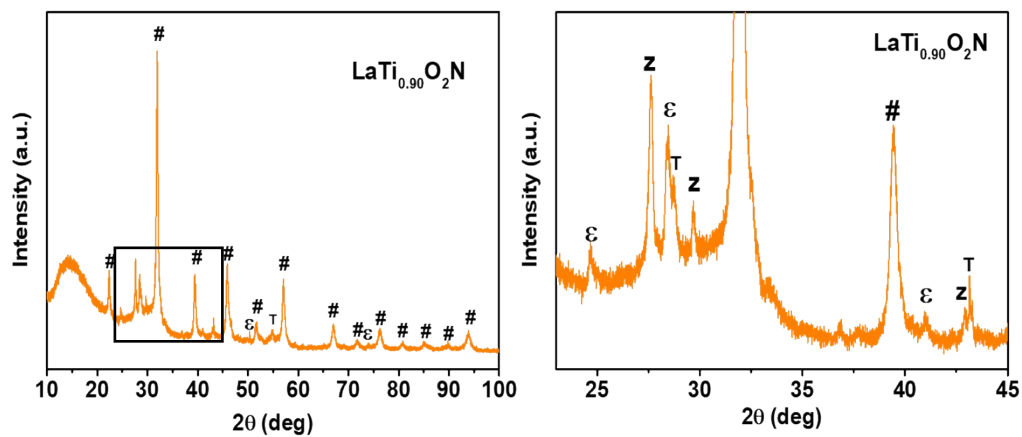

**Figure. S7** XRD result of  $\text{LaTi}_{0.90}\text{O}_2\text{N}$  and its corresponding zoomed in data from  $2\theta$  values  $23^\circ$  to  $45^\circ$ . (#  $\text{LaTiNO}_2$  PDF: 04-014-5881), (T  $\text{Ti}_6\text{O}_{11}$  PDF: 00-050-0788), ( $\epsilon$   $\text{La}_2\text{TiO}_5$  PDF: 04-011-9299), (Z  $\text{La}_2\text{Ti}_2\text{O}_7$  PDF: 00-017-0451)

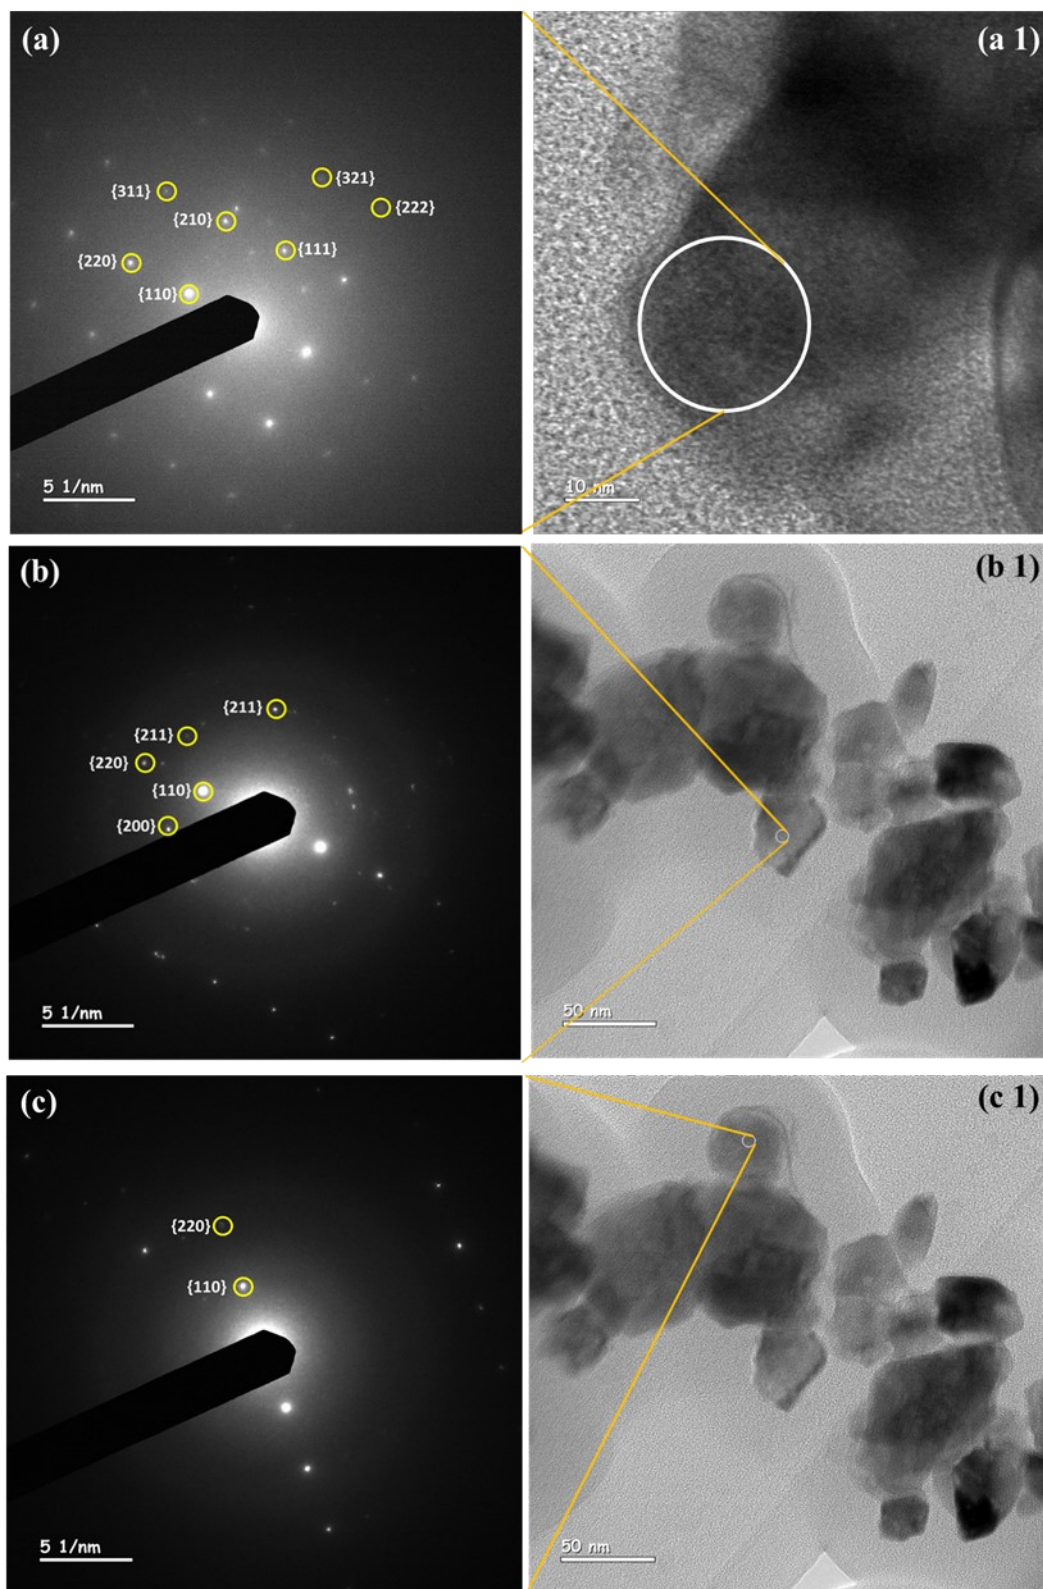

**Figure S8.** (a), (b), and (c) SAED results of the circled region (a1), (b1), and (c1), respectively, for the sample 5%Cu-LTON. The unlabeled peaks without a symmetrical point on the other side of the beam are expected to be contaminating phase (identified by XRD) out of zone axis.

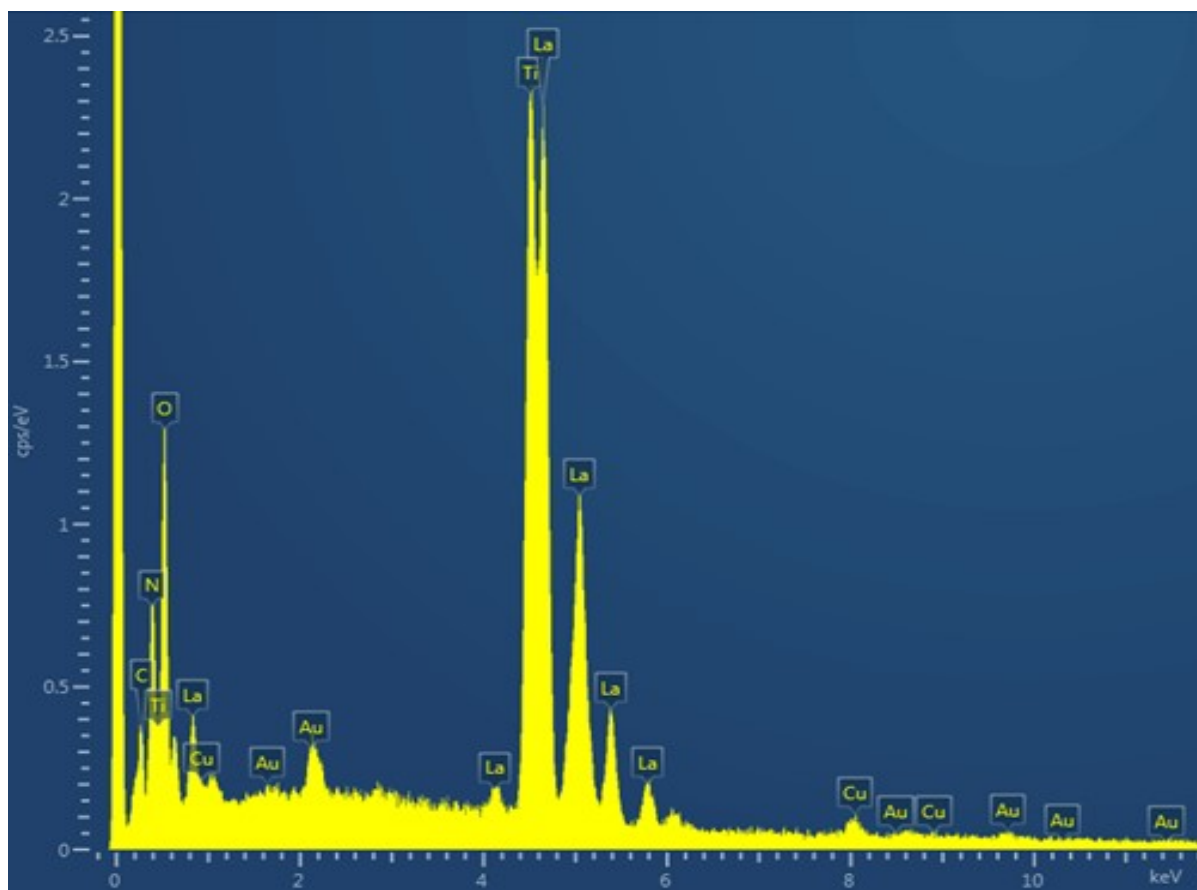

Figure S9. SEM-EDS analysis of 5%Cu-LTON.

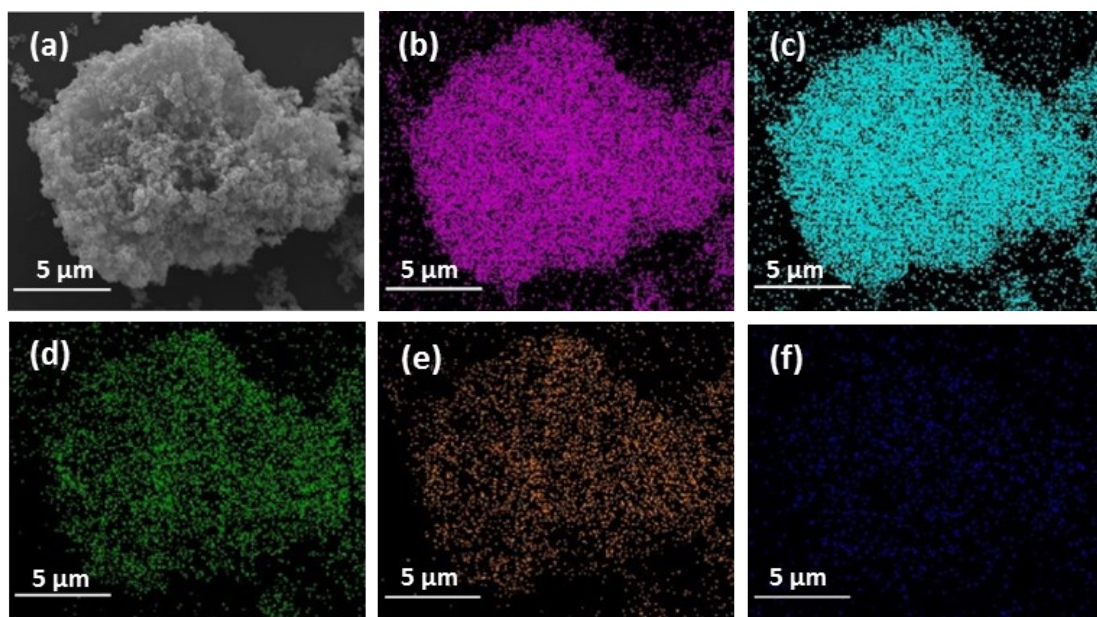

**Figure S10.** (a) SEM backscatter image of an agglomerated Cu-LTON support and EDS elemental mapping of Cu-LTON showing the distribution of (b) La, (c) Ti, (d) O, (e) N, and (f) Cu.



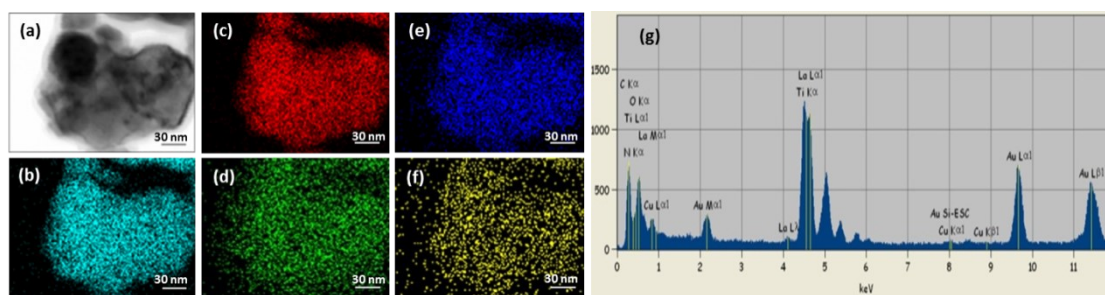

**Figure S11.** (a) Bright-field TEM image of 5%Cu-LTON and its corresponding, EDX-STEM mapping showing the distribution of (b) La, (c) Ti, (d) N, (e) O, (f) Cu, and (g) TEM-EDS image.

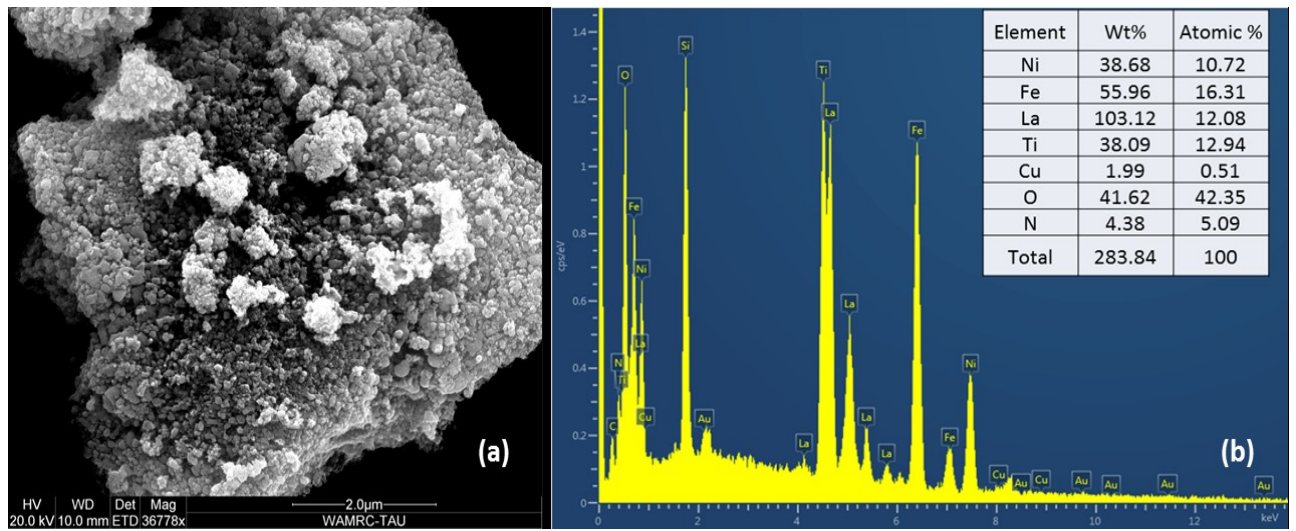

**Figure S12.** (a) SEM image of  $\text{Ni}_{1.5}\text{Fe}_{2.1}/5\%\text{Cu-LTON}$  and its (b) EDS analysis.

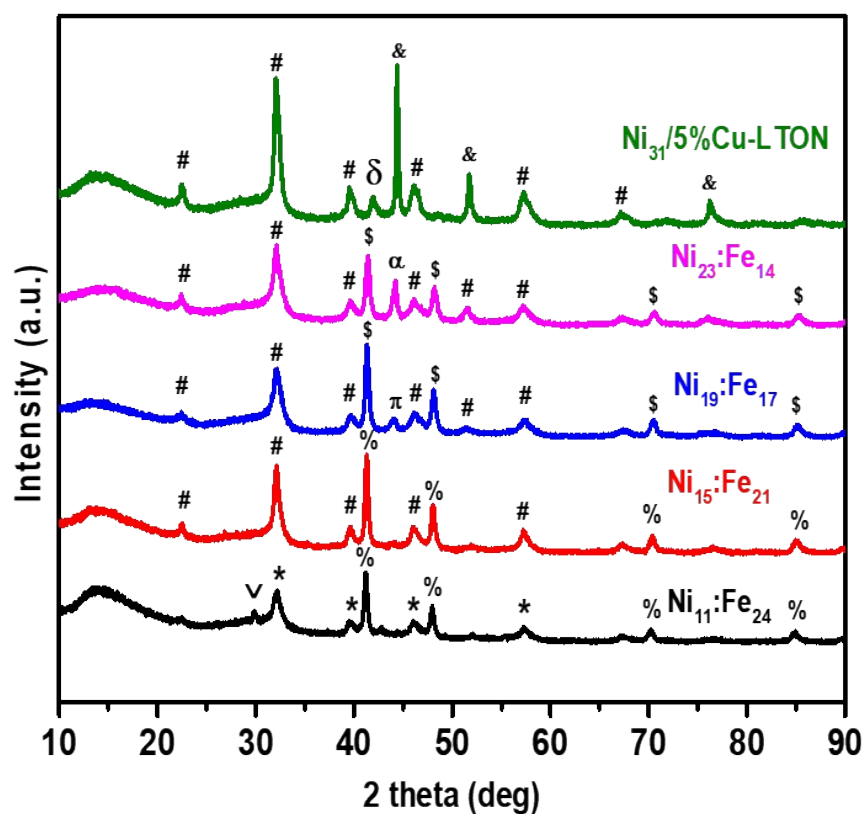

**Figure S13.** Powder XRD patterns of Ni<sub>y</sub>Fe<sub>z</sub>/5%Cu-LTON samples. (# LaTiNO<sub>2</sub> 04-014-5881), (v La<sub>2</sub>Ti<sub>2</sub>O<sub>7</sub> 00-028-0517), (\* LaTiO<sub>2</sub>N 00-048-1230), (% Fe<sub>3</sub>NiN 00-009-0318), (\$) Fe<sub>2</sub>Ni<sub>2</sub>N 00-050-1350), (π Fe<sub>0.4</sub>Ni<sub>0.6</sub> 04-004-8867), (α Fe<sub>0.15</sub>Ni<sub>0.85</sub> 04-024-7186), (& Ni 04-010-6148), (δ La<sub>5</sub>Ni<sub>19</sub> 04-017-4192).

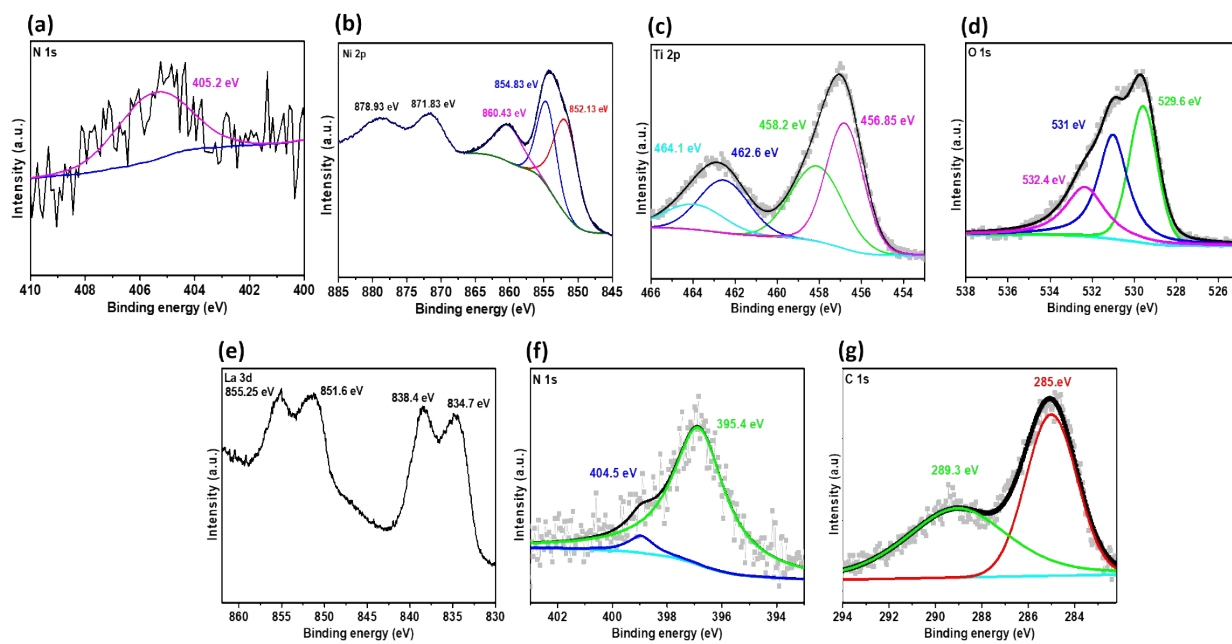

**Figure S14.** HR- XPS results (a) N 1s, (b) Ni 2p of Ni<sub>31</sub>/5%Cu-LTON treated under 5% H<sub>2</sub> and (c) Ti 2p, (d) O 1s, (e) La 3d, (f) N 1s, and (g) C 1s for the 5%Cu-LTON catalyst.

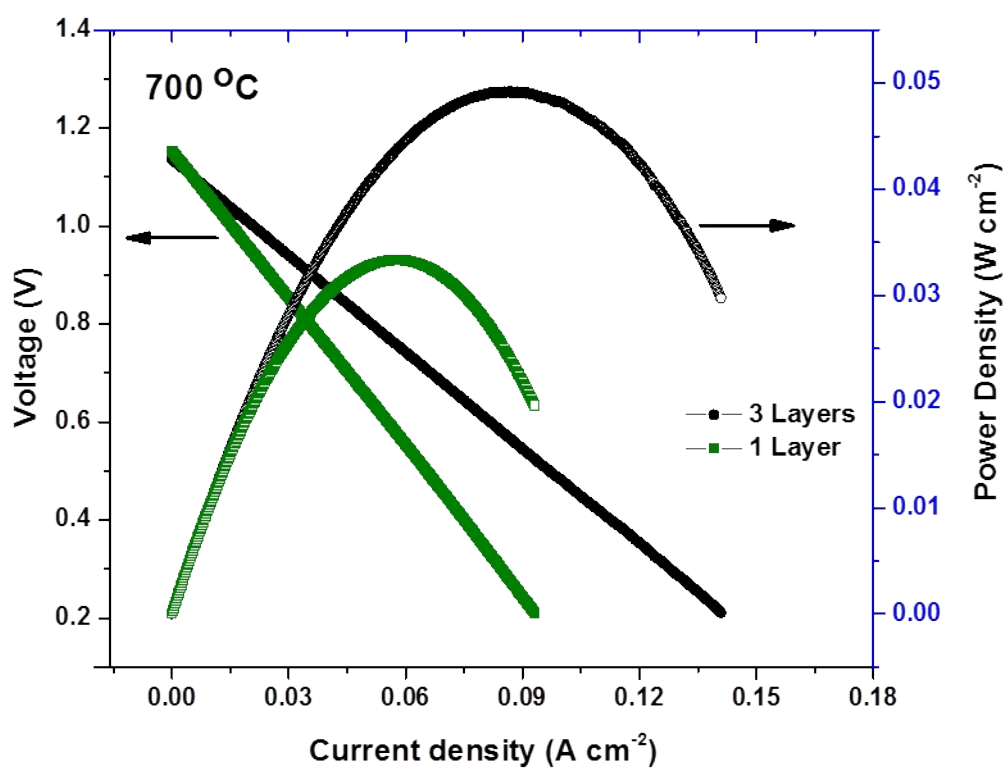

**Figure S15.** Single layer vs three layer I-V curves of Ni<sub>15</sub>Fe<sub>14</sub>/5% Cu-LTON anode SOFC.

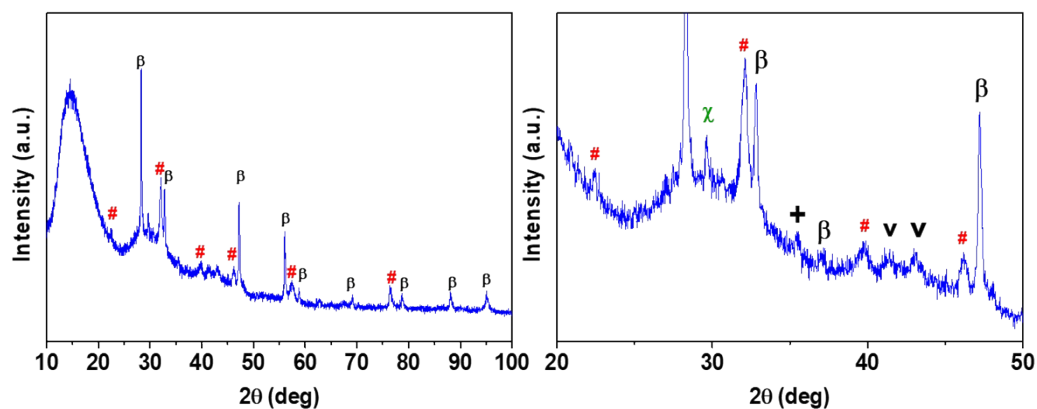

**Figure S16.** XRD results of used DA-SOFC cell Ni<sub>15</sub>:Fe<sub>21</sub> / 5%Cu-LTON.

(\* LaTiO<sub>2</sub>N PDF: 00-048-1230), (β Ce<sub>1.5</sub>Gd<sub>0.5</sub>O<sub>3.75</sub> PDF: 04-020-7979), (χ Y<sub>4</sub>Zr<sub>3</sub>O<sub>12</sub> PDF: 04-002-0211), (v La<sub>2</sub>Ti<sub>2</sub>O<sub>7</sub> PDF: 00-015-0334), (+ Ti<sub>5</sub>O<sub>9</sub> PDF: 04-005-4465)

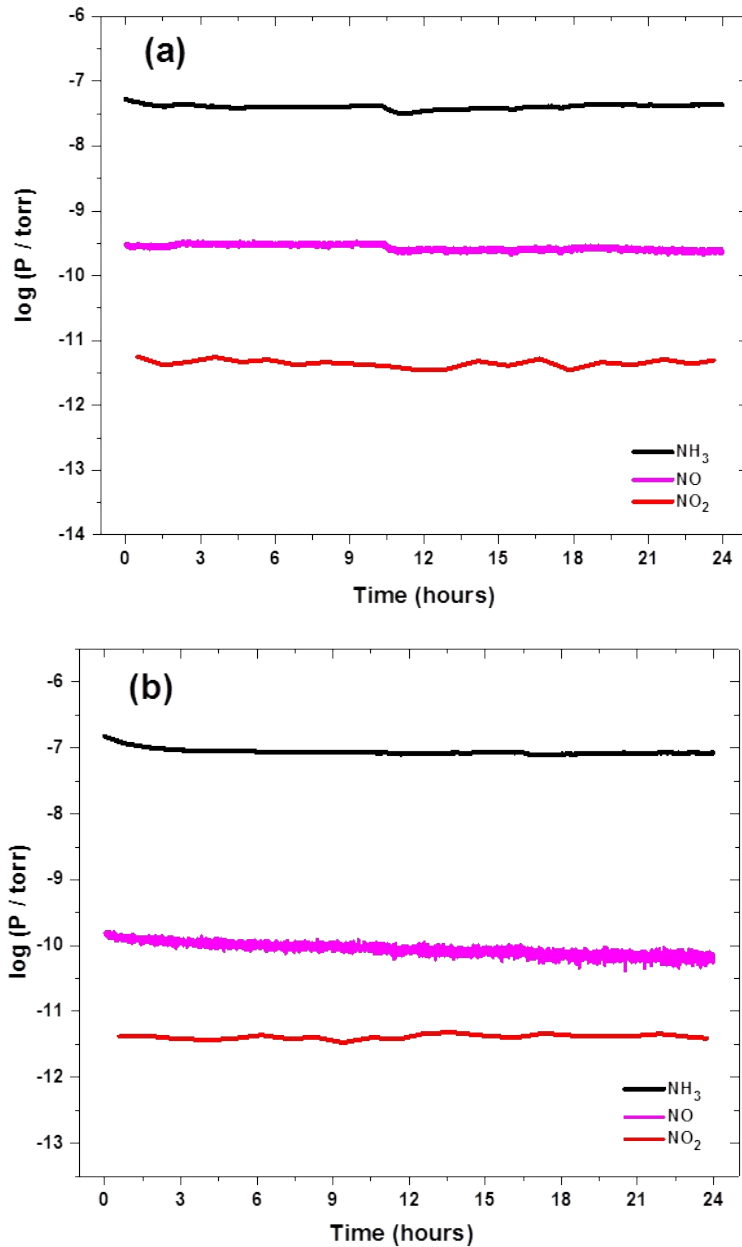

**Figure S17.** Partial pressure curves of  $\text{NH}_3$  and  $\text{NO}_x$  gases of (a)  $\text{Ni}_{15}\text{Fe}_{21}/5\%\text{Cu}$ -LTON cell and (b)  $\text{Ni}_{19}\text{Fe}_{17}/5\%\text{Cu}$ -LTON cell are presented. The curves show the partial pressure of the gases as a function of time during 24 hours at  $750^\circ\text{C}$  temperature. The total pressure in the vacuum system was  $6.3 \times 10^{-6}$  torr.

**Table S1.** SEM-EDS elemental analysis results of  $\text{LaTi}_{0.95}\text{O}_2\text{N}$ .

|                 | <b>La</b> | <b>Ti</b> | <b>O</b> | <b>N</b> | <b>Stoichiometry</b>                                             |
|-----------------|-----------|-----------|----------|----------|------------------------------------------------------------------|
| <b>Sample 1</b> | 17.32     | 17.88     | 53.8     | 10.99    | $\text{La}_{1.00}\text{Ti}_{1.03}\text{O}_{3.10}\text{N}_{0.63}$ |
| <b>Sample 2</b> | 15.39     | 16.12     | 55.96    | 12.53    | $\text{La}_{1.00}\text{Ti}_{1.04}\text{O}_{3.63}\text{N}_{0.81}$ |
| <b>Sample 3</b> | 18.8      | 17.14     | 52.71    | 11.34    | $\text{La}_{1.00}\text{Ti}_{0.91}\text{O}_{2.8}\text{N}_{0.60}$  |
| <b>Sample 4</b> | 14.52     | 15.09     | 58.57    | 11.82    | $\text{La}_{1.00}\text{Ti}_{1.03}\text{O}_4\text{N}_{0.81}$      |



**Table S2.** SEM-EDX elemental analysis results of 5%Cu/LTON

|                 | <b>Cu</b> | <b>La</b> | <b>Ti</b> | <b>O</b> | <b>N</b> | <b>Stoichiometry</b>                                                              |
|-----------------|-----------|-----------|-----------|----------|----------|-----------------------------------------------------------------------------------|
| <b>Sample 1</b> | 0.96      | 15.2      | 16.75     | 51.3     | 15.78    | $\text{Cu}_{0.06}\text{-La}_{1.00}\text{Ti}_{1.10}\text{O}_{3.37}\text{N}_{1.03}$ |
| <b>Sample 2</b> | 0.9       | 16.43     | 16.82     | 53.01    | 12.84    | $\text{Cu}_{0.05}\text{-La}_{1.00}\text{Ti}_{1.02}\text{O}_{3.22}\text{N}_{0.78}$ |
| <b>Sample 3</b> | 1.75      | 19.45     | 22.7      | 42.63    | 13.48    | $\text{Cu}_{0.09}\text{-La}_{1.00}\text{Ti}_{1.16}\text{O}_{2.19}\text{N}_{0.69}$ |
| <b>Sample 4</b> | 0.86      | 15.71     | 16.38     | 56.61    | 10.44    | $\text{Cu}_{0.05}\text{-La}_{1.00}\text{Ti}_{1.04}\text{O}_{3.6}\text{N}_{0.66}$  |

**Table S3:** Peak powder densities of ammonia-fueled SOFCs having YSZ electrolyte.

| <b>Anode</b>                                     | <b>Cathode</b>         | <b>Operating Temperature<br/>[°C]</b> | <b>YSZ Electrolyte Thickness [μm]</b> | <b>Peak Power Density<br/>[mWcm<sup>-2</sup>]</b> |
|--------------------------------------------------|------------------------|---------------------------------------|---------------------------------------|---------------------------------------------------|
| Ba-Ni-YSZ                                        | LSCF                   | 750                                   | 10                                    | 275 [1]                                           |
| NiO/YSZ                                          | LSCF                   | 750                                   | 10                                    | 195[2]                                            |
| NiO/YSZ                                          | LSM-YSZ                | 800                                   | 15                                    | 202 [3]                                           |
| Ni-YSZ                                           | LSF                    | 700                                   | 4-6                                   | 325 [4]                                           |
| Ni-YSZ                                           | LSM-YSZ                | 750                                   | 30                                    | 299 [5]                                           |
| Ni-YSZ                                           | LSM-YSZ                | 700                                   | --                                    | 38[6]                                             |
| <b><i>Ni:Fe/Cu-LTON+GDC<br/>(This study)</i></b> | <b><i>LSCF-GDC</i></b> | <b><i>750</i></b>                     | <b><i>43</i></b>                      | <b><i>230</i></b>                                 |

**Table S4.** SEM-EDX elemental analysis results of used cell Ni<sub>15</sub>:Fe<sub>21</sub>/5%Cu-LTON.

|               | <b>Cu</b> | <b>La</b> | <b>Ti</b> | <b>O</b> | <b>N</b> | <b>Ni</b> | <b>Fe</b> | <b>Gd</b> | <b>Ce</b> | <b>C</b> |
|---------------|-----------|-----------|-----------|----------|----------|-----------|-----------|-----------|-----------|----------|
| <b>Site 1</b> | 0.17      | 3.86      | 3.86      | 65.12    | 0.46     | 3.59      | 4.45      | 0.52      | 5.49      | 12.48    |
| <b>Site 2</b> | 0.13      | 2.85      | 2.86      | 66.39    | 0.56     | 2.87      | 4.52      | 0.33      | 4.11      | 15.39    |
| <b>Site 3</b> | 0.12      | 2.98      | 2.97      | 68.71    | 0.3      | 3.63      | 6.09      | 0.39      | 4.82      | 9.98     |
| <b>Site 4</b> | 0.31      | 3.05      | 3.14      | 55.57    | 1.19     | 4.07      | 6.97      | 0.8       | 11.18     | 13.73    |
| <b>Site 5</b> | 0.04      | 3.3       | 3.35      | 64.23    | 0.48     | 3.34      | 5.2       | 0.69      | 6.36      | 13       |
| <b>Site 6</b> | 0.08      | 3.1       | 2.96      | 64.58    | 0.53     | 3.45      | 4.89      | 0.72      | 7.12      | 12.55    |

## References:

- [1] Y. Wang, J. Yang, J. Wang, W. Guan, B. Chi, L. Jia, J. Chen, H. Muroyama, T. Matsui, K. Eguchi, Low-Temperature Ammonia Decomposition Catalysts for Direct Ammonia Solid Oxide Fuel Cells, *J. Electrochem. Soc.* 167 (2020) 064501. <https://doi.org/10.1149/1945-7111/ab7b5b>.
- [2] M. Zandrini, M. Testi, M. Trini, P. Daniele, J. Van Herle, L. Crema, Assessment of ammonia as energy carrier in the use with reversible solid oxide cells, *Int. J. Hydrogen Energy.* 46 (2021) 30112–30123. <https://doi.org/10.1016/j.ijhydene.2021.06.139>.
- [3] L. ZHANG, Y. CONG, W. YANG, L. LIN, A Direct Ammonia Tubular Solid Oxide Fuel Cell, *Chinese J. Catal.* 28 (2007) 749–751. [https://doi.org/10.1016/S1872-2067\(07\)60062-X](https://doi.org/10.1016/S1872-2067(07)60062-X).
- [4] J. Yang, A.F.S. Molouk, T. Okanishi, H. Muroyama, T. Matsui, K. Eguchi, A Stability Study of Ni/Yttria-Stabilized Zirconia Anode for Direct Ammonia Solid Oxide Fuel Cells, *ACS Appl. Mater. Interfaces.* 7 (2015) 28701–28707. <https://doi.org/10.1021/acsami.5b11122>.
- [5] Q. Ma, J. Ma, S. Zhou, R. Yan, J. Gao, G. Meng, A high-performance ammonia-fueled SOFC based on a YSZ thin-film electrolyte, *J. Power Sources.* 164 (2007) 86–89. <https://doi.org/10.1016/j.jpowsour.2006.09.093>.
- [6] A. Fuerte, R.X. Valenzuela, M.J. Escudero, L. Daza, Ammonia as efficient fuel for SOFC, *J. Power Sources.* 192 (2009) 170–174. <https://doi.org/10.1016/j.jpowsour.2008.11.037>.
